# Supplementary material for: Development and Application of an Assay to Evaluate the Anti-Parasitic Effect of Humoral Responses against Trypanosoma cruzi
Source: MDPI journal article supplement (doi:10.3390/microorganisms11020241), 2023-01-18
Supplement: s1 [file s1]

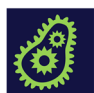

## Article

# Antisera: An Assay to Evaluate the Anti-parasitic Effect of Hu-Moral Responses Against *Trypanosoma cruzi*

Nieves Martinez-Peinado <sup>1,2,\*</sup>, Juan Carlos Gabaldon-Figueira <sup>1</sup>, Ignacio Martinez-Añon <sup>1</sup>, Cristian Rodríguez-Gordo <sup>3</sup>, Raquel Robleda-Castillo <sup>1</sup>, Maria-Jesus Pinazo <sup>1,4,5</sup>, Pascal Bigey <sup>6,7</sup>, Joaquim Gascon <sup>1,5</sup> and Julio Alonso-Padilla <sup>1,5,\*</sup>

<sup>1</sup> Barcelona Institute for Global Health (ISGlobal), Hospital Clínic-University of Barcelona, Barcelona, Spain

<sup>2</sup> Secció de Parasitologia, Departament de Biologia, Sanitat i Medi Ambient, Facultat de Farmàcia i Ciències de l'Alimentació, Universitat de Barcelona, Barcelona, Spain

<sup>3</sup> Laboratori de Referència Catalunya, Prat de Llobregat (EL), Barcelona, Spain

<sup>4</sup> Drugs for Neglected Diseases initiative (DNDi), Switzerland

<sup>5</sup> CIBERINFEC, ISCIII—CIBER de Enfermedades Infecciosas, Instituto de Salud Carlos III, Madrid, Spain

<sup>6</sup> CNRS, INSERM, UTCBS, Université Paris Cité, F-75006 Paris, France

<sup>7</sup> Chimie ParisTech, PSL University, F-75005 Paris, France

\* Correspondence: nieves.martinez@isglobal.org (N.M.-P.); julio.a.padilla@isglobal.org (J.A.-P.);

Tel.: 0034-932275400 (ext. 4284)

## Supplementary Materials

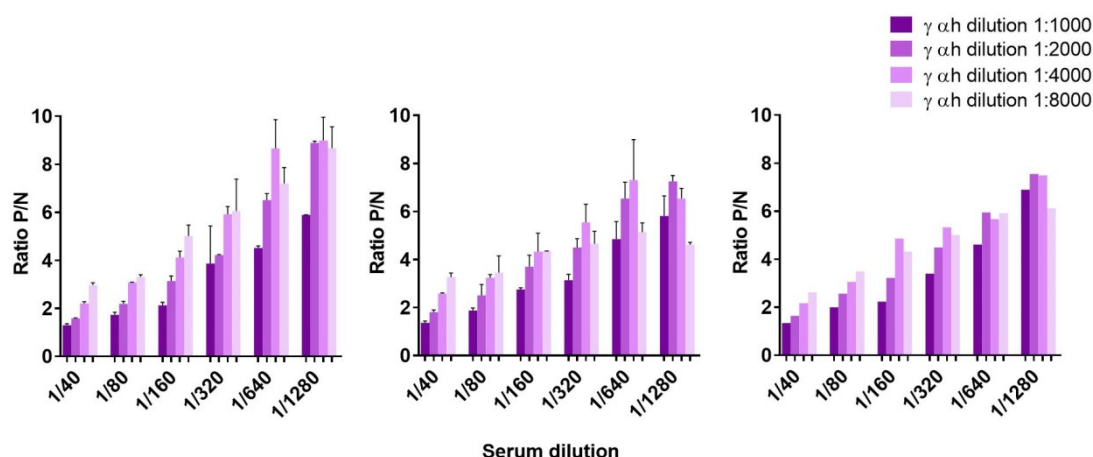

**Figure S1. Set-up of the in-house ELISA test.** Absorbance windows under different assay conditions using whole lysates of: (a) amastigotes; (b) trypomastigotes; or (c) amastigote/trypomastigote mix, as coating antigens. Colors represent different dilutions of the human  $\gamma$ -gah secondary IgG antibody.

A checkerboard set-up was used to determine the optimal antigen concentration to be used in the in-house ELISA. Similarly, optimal concentrations of positive and negative pooled human serum (test) samples, and secondary goat anti-human ( $\gamma$ -gah) IgG coupled to horseradish peroxidase (Jackson ImmunoResearch, Philadelphia, USA) were selected by testing serial dilutions ranging from 1/40 to 1/1280, and 1/1000 to 1/8000, respectively.

The largest absorbance window between pooled positive and negative samples was observed using an antigen concentration of 0.2  $\mu$ g per well (1:1 mixture of trypomastigotes and amastigotes), a 1/640 serum dilution, and a 1/4000  $\gamma$ -gah IgG dilution (Figure S1). Thereafter, the performance of the in-house ELISA under these conditions was evaluated by measuring the reactivity of individual serum samples from confirmed *T. cruzi*-infected and non-infected controls.

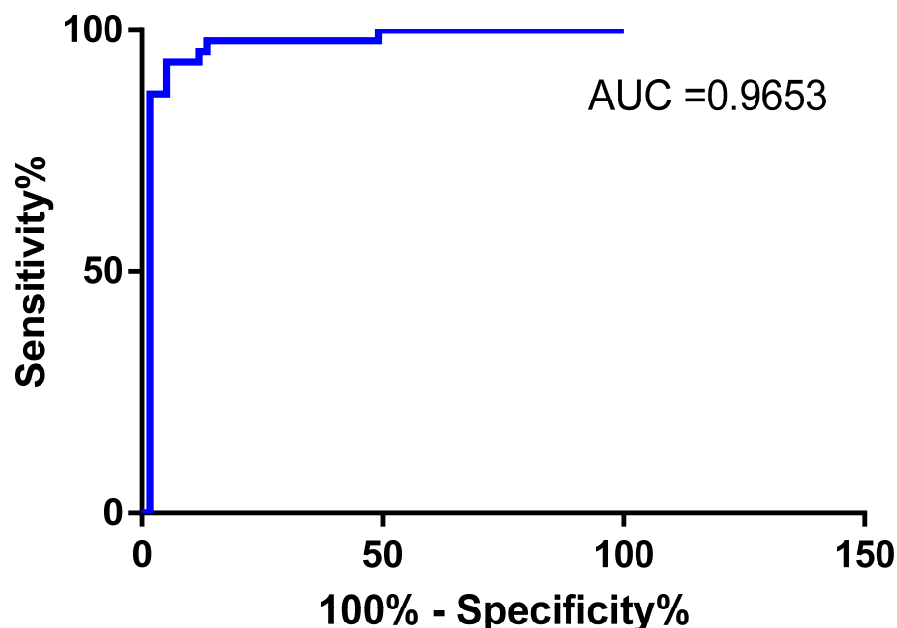

**Figure S2. Receiving Operating Characteristics (ROC) analysis of the performance of the in-house ELISA.** The sensitivity and specificity of the in-house ELISA was calculated for different P/N thresholds, and compared to the diagnosis provided by the Service of Tropical Medicine of the Hospital Clinic, obtained after using two different commercial kits (gold standard).

A ROC analysis revealed an area under the curve (AUC) of 0.965 (CI95%: 0.925 - 1.00; Figure S2). A cut-off value for the P/N ratio of 2.4 provided the highest sensitivity (93.3%; CI95%: 81.7 - 98.6) and specificity (94.9%; CI95%: 85.9 - 98.9), in comparison to the commercial ELISA and CMIA kits used by the Hospital Clinic of Barcelona.

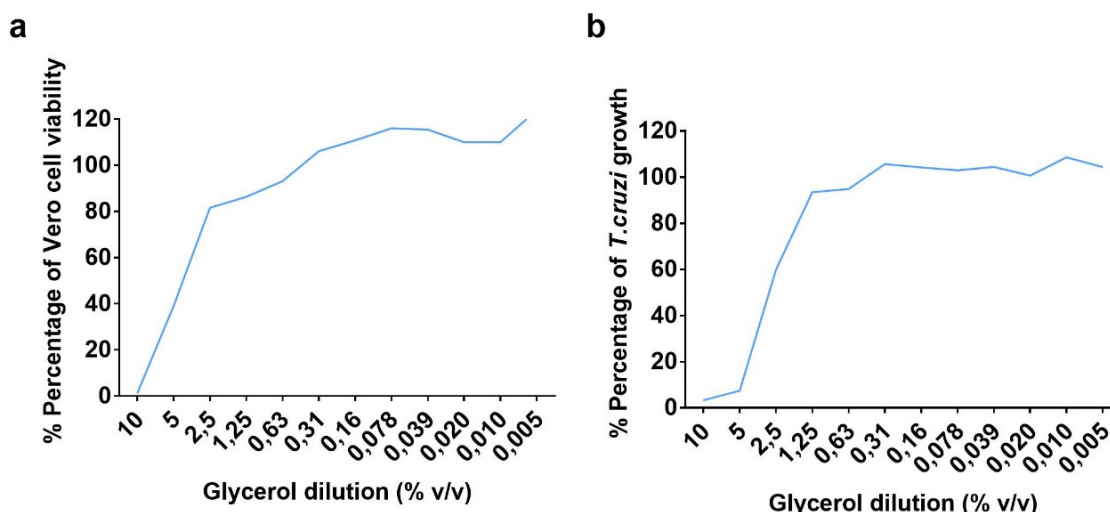

**Figure S3. Evaluation of glycerol toxicity over the two cell types used in the antisera assay.** (a) Uninfected Vero cells; and (b) *T. cruzi*-infected Vero cells cultures.

We observed that concentrations of glycerol above 0.625% per well were toxic to Vero cells and thus capable to interfering with the in vitro growth of *T. cruzi*, with host cells viability being markedly suppressed at concentrations above 5%.

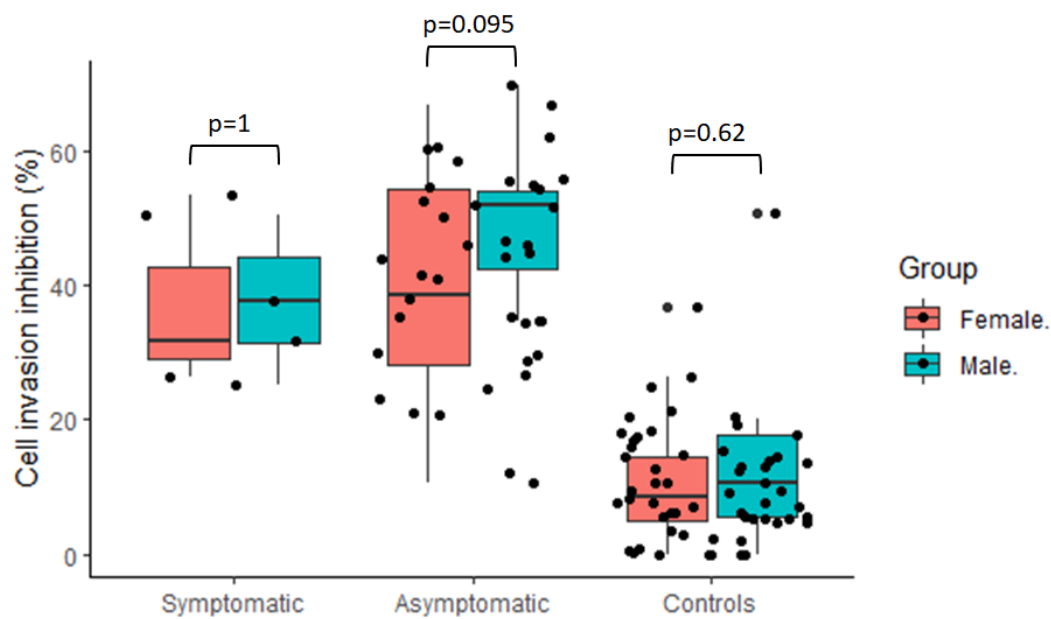

**Figure S4.** Inhibition of parasite invasion after incubation with serum samples from female and male participants at dilution 1/12. No statistically significant differences were observed between male and females in any clinical groups.

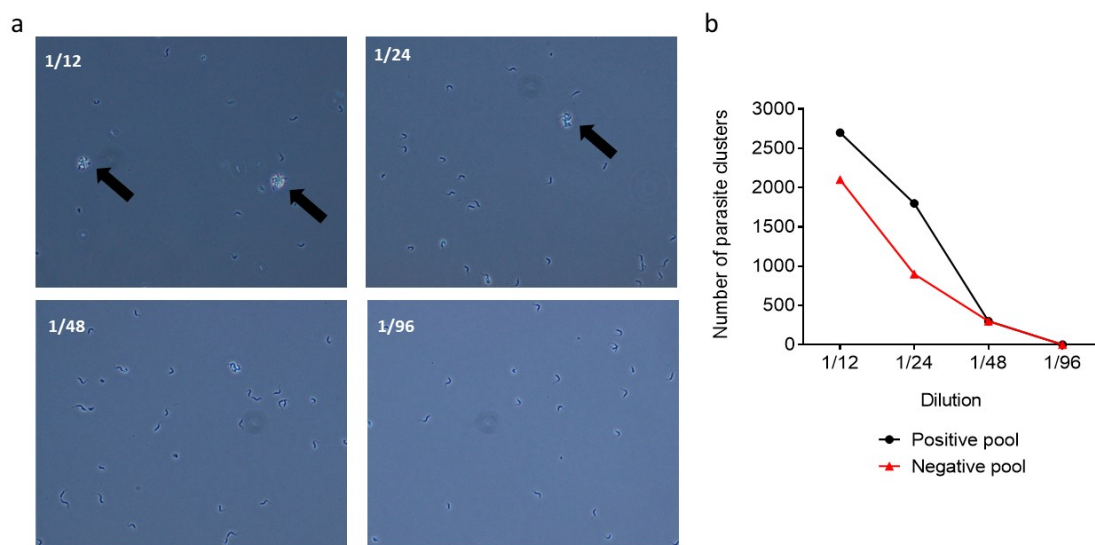

**Figure S5.** Effect of serum incubation on trypomastigotes. Representative images of trypomastigotes after incubating for 1 h at 37 °C with positive sera at dilutions 1/12 to 1/96 (a); and the corresponding number of clusters of trypomastigotes (b). Pictures were taken at a 400× magnification with a microscope Olympus IX-51 (Hamburg, Germany). Notice clumping of parasites in panel a (arrowheads).

**Table S1.** Performance of the in-house ELISA compared to commercial diagnostic kits used by the laboratory of the Hospital Clinic of Barcelona.

|                 |          | In-house ELISA |          |       |
|-----------------|----------|----------------|----------|-------|
|                 |          | Positive       | Negative | Total |
| ELISA/CMIA      | Positive | 42             | 3        | 45    |
| Hospital Clinic | Negative | 3              | 56       | 59    |
| Total           |          | 45             | 59       | 104   |

**Table S2.** Master table for the in-house ELISA and parasite cell invasion inhibition assays.

Available in the additional excel file.
