# Supplementary material for: Development and Application of an Assay to Evaluate the Anti-Parasitic Effect of Humoral Responses against Trypanosoma cruzi
Source: Microorganisms. 2023 Jan 18;11(2):241. doi: 10.3390/microorganisms11020241 (PMC9966445; doi:10.3390/microorganisms11020241)
Supplement: Supplementary file 1 [file microorganisms-11-00241-s001.zip › microorganisms-2106119-supplementary-Table S2.xlsx]

## Sheet: Master table
Table S2. Master table for the in-house ELISA and parasite cell invasion inhibition assays. The dataset includes: Mean absorbance and P/N ratios of individual samples tested with the in-house ELISA (total antigen: 0.2 µg, serum dilution: 1/640, secondary antibody dilution: 1/4000); Mean proportional inhibition of parasite invasion from wells. The dataset also includes the diagnosis reached using …
For the legend, see below the last line.
	Mean inhibition of parasite invasion (three replicates)				Diagnosis (Hospital Clinic)			Diagnosis (in-house ELISA)			Epidemiologic characteristics
Study ID	1/12	1/24	1/48	1/96	ELISA	CMIA	Diagnosis	Mean absorbance	SD	P/N ratio	Age	Sex	Origin	Immune suppression	Cause of immune suppression	EKG	US	RX	Kuschnir	Observations	Classification
10836	10.47	9.90	11.46	0.00	NA	NA	neg	0.13	0.01	0.70	52	f	Bolivia	n	NA	normal	NA	NA	NA	NA	control
10955	17.38	23.8558	33.30	26.36	NA	NA	neg	0.04	0.00	0.32	45	m	Bolivia	y	other	NA	NA	NA	NA	NA	control
11358	16.68	7.56	3.12	0.00	NA	NA	neg	0.21	0.04	1.14	46	f	Bolivia	n	NA	normal	NA	NA	NA	NA	control
11582	5.16	6.73	0.00	0.00	NA	NA	neg	0.10	0.01	0.54	29	f	Bolivia	n	NA	normal	NA	NA	NA	NA	control
12059	0.00	0.00	0.00	0.00	NA	NA	neg	0.31	0.02	1.69	58	f	Argentina	n	NA	normal	NA	NA	NA	NA	control
12485	7.64	0.00	0.00	0.00	NA	NA	neg	0.08	0.02	0.43	39	f	Bolivia	n	NA	abnormal	NA	NA	NA	NA	control
12488	6.03	0.00	0.00	0.00	NA	NA	neg	0.06	0.01	0.30	41	m	Bolivia	n	NA	normal	NA	NA	NA	NA	control
12492	0.00	0.00	0.00	0.00	NA	NA	neg	0.10	0.01	0.53	33	m	Bolivia	n	NA	normal	NA	NA	NA	NA	control
12495	7.70	0.00	0.00	0.00	NA	NA	neg	0.14	0.01	0.75	36	f	Bolivia	n	NA	normal	NA	NA	NA	NA	control
12496	1.99	0.00	0.00	0.00	NA	NA	neg	0.10	0.02	0.55	35	m	Bolivia	n	NA	normal	NA	NA	NA	NA	control
12500	0.00	0.00	0.00	0.00	NA	NA	neg	0.09	0.02	0.46	46	f	Bolivia	y	auto	normal	NA	NA	NA	NA	control
12502	10.49	6.13	0.00	0.61	NA	NA	neg	0.10	0.01	0.54	35	m	Bolivia	n	NA	normal	NA	NA	NA	NA	control
12503	0.89	4.80	0.00	4.30	NA	NA	neg	0.14	0.01	0.78	36	f	Bolivia	n	NA	NA	NA	NA	NA	NA	control
12507	12.24	12.42	0.68	0.00	NA	NA	neg	0.14	0.01	0.75	34	f	Bolivia	n	NA	normal	NA	NA	NA	NA	control
12518	14.78	9.46	0.00	0.00	NA	NA	neg	0.26	0.02	1.41	43	f	Bolivia	n	NA	normal	NA	NA	NA	NA	control
12519	3.41	0.00	0.00	0.00	NA	NA	neg	0.08	0.01	0.45	29	f	Bolivia	n	NA	normal	NA	NA	NA	NA	control
12522	15.98	10.78	0.32	0.00	NA	NA	neg	0.67	0.04	3.60	29	f	Bolivia	n	NA	NA	NA	NA	NA	NA	control
12526	6.14	9.97	4.01	42.43	NA	NA	neg	0.17	0.01	0.89	44	f	Bolivia	n	NA	normal	NA	NA	NA	NA	control
12530	9.50	1.10	0.00	47.55	NA	NA	neg	0.11	0.02	0.58	52	f	Bolivia	n	NA	normal	NA	NA	NA	NA	control
12543	13.54	1.56	1.69	5.50	NA	NA	neg	0.27	0.01	1.47	49	f	Bolivia	n	NA	normal	NA	NA	NA	NA	control
12544	15.22	6.41	0.00	0.00	NA	NA	neg	0.21	0.02	1.11	37	f	Bolivia	n	NA	normal	NA	NA	NA	NA	control
12545	10.71	0.00	0.00	0.00	NA	NA	neg	0.14	0.00	0.76	62	f	Bolivia	n	NA	normal	NA	NA	NA	NA	control
12551	4.78	3.18	0.00	0.00	NA	NA	neg	0.14	0.03	0.75	43	f	Bolivia	n	NA	normal	NA	NA	NA	NA	control
12556	18.27	8.29	0.00	0.00	NA	NA	neg	0.06	0.00	0.33	46	m	Bolivia	n	NA	normal	NA	NA	NA	NA	control
12557	19.08	0.00	0.00	7.35	NA	NA	neg	0.18	0.04	0.96	64	f	NA	n	NA	normal	NA	NA	NA	NA	control
12558	17.97	0.00	0.00	0.00	NA	NA	neg	0.07	0.01	0.39	39	m	NA	y	other	abnormal	NA	NA	NA	NA	control
12559	36.73	3.57	0.00	0.00	NA	NA	neg	0.09	0.01	0.46	41	f	Bolivia	n	NA	normal	NA	NA	NA	NA	control
12563	17.71	0.00	0.00	0.00	NA	NA	neg	0.09	0.02	0.49	48	f	Bolivia	n	NA	normal	NA	NA	NA	NA	control
12566	6.07	0.00	0.00	0.00	NA	NA	neg	0.11	0.01	0.62	40	f	Bolivia	n	NA	abnormal	NA	NA	NA	NA	control
12568	5.51	0.00	1.24	0.00	NA	NA	neg	0.13	0.02	0.68	48	f	Bolivia	y	other	normal	NA	normal	NA	NA	control
12569	9.52	0.00	0.00	0.40	NA	NA	neg	0.19	0.02	1.03	30	f	NA	y	other	normal	NA	NA	NA	NA	control
12577	2.77	0.00	0.00	0.00	NA	NA	neg	0.06	0.00	0.31	52	f	Bolivia	y	other	normal	NA	NA	NA	NA	control
12602	2.34	0.00	0.00	0.00	NA	NA	neg	0.10	0.02	0.53	52	m	Bolivia	y	other	NA	NA	NA	NA	NA	control
12604	7.50	2.12	0.95	0.00	NA	NA	neg	0.17	0.02	0.89	57	f	Bolivia	n	NA	NA	NA	NA	NA	NA	control
12605	21.34	8.96	0.00	0.00	NA	NA	neg	0.06	0.14	0.31	66	f	Ecuador	n	NA	normal	NA	normal	NA	NA	control
12607	5.67	0.00	0.00	0.00	NA	NA	neg	0.07	0.01	0.35	41	m	Bolivia	n	NA	normal	NA	NA	NA	NA	control
12608	4.70	0.00	0.00	0.00	NA	NA	neg	0.51	0.02	2.75	55	f	Bolivia	n	NA	normal	NA	NA	NA	NA	control
12612	5.55	0.00	0.00	0.00	NA	NA	neg	0.39	0.02	2.10	62	f	Bolivia	n	NA	normal	NA	NA	NA	NA	control
12615	13.02	5.72	0.00	0.00	NA	NA	neg	0.09	0.02	0.50	63	m	Bolivia	n	NA	normal	NA	NA	NA	NA	control
12631	8.94	0.56	0.00	0.00	NA	NA	neg	0.06	0.00	0.33	49	f	Bolivia	n	NA	normal	NA	NA	NA	NA	control
12632	13.07	0.00	0.00	0.00	NA	NA	neg	0.06	0.01	0.51	25	f	Bolivia	n	NA	normal	NA	NA	NA	NA	control
12639	20.24	0.00	3.37	0.00	NA	NA	neg	0.07	0.02	0.63	42	m	Bolivia	n	NA	normal	NA	NA	NA	NA	control
12643	0.09	0.00	0.00	0.00	NA	NA	neg	0.04	0.00	0.30	40	f	Bolivia	n	NA	normal	NA	normal	NA	NA	control
12644	13.82	0.75	0.00	0.00	NA	NA	neg	0.14	0.01	1.22	26	m	España	n	NA	normal	NA	NA	NA	NA	control
12651	8.18	8.33	12.49	16.25	NA	NA	neg	0.11	0.02	0.93	53	f	Bolivia	n	NA	normal	NA	NA	NA	NA	control
12654	12.58	3.39	0.00	0.00	NA	NA	neg	0.04	0.28	0.31	36	f	Bolivia	n	NA	normal	NA	NA	NA	NA	control
12689	50.85	45.99	37.20	32.33	NA	NA	neg	1.37	0.03	11.84	57	m	Bolivia	n	NA	abnormal	NA	NA	NA	NA	control
12698	7.05	7.28	18.24	13.23	NA	NA	neg	0.09	0.01	0.77	23	f	Bolivia	n	NA	normal	NA	NA	NA	NA	control
12719	20.35	28.97	41.99	40.27	NA	NA	neg	0.13	0.02	1.16	38	f	Bolivia	n	NA	normal	NA	NA	NA	NA	control
12723	24.76	31.87	35.05	33.21	NA	NA	neg	0.05	0.01	0.41	69	f	Bolivia	n	NA	normal	NA	NA	NA	NA	control
12728	14.34	30.58	31.74	28.72	NA	NA	neg	0.09	0.01	0.82	37	f	Bolivia	n	NA	normal	NA	NA	NA	NA	control
12739	0.00	0.00	0.00	0.00	NA	NA	neg	0.05	0.01	0.44	40	f	Bolivia	n	NA	NA	NA	NA	NA	NA	control
12745	14.39	3.49	1.90	0.00	NA	NA	neg	0.09	0.01	0.82	36	f	Bolivia	n	NA	normal	NA	NA	NA	NA	control
12749	7.13	2.20	0.00	0.00	NA	NA	neg	0.11	0.02	0.98	41	m	Bolivia	n	NA	normal	NA	NA	NA	NA	control
12776	5.08	0.27	0.00	0.00	NA	NA	neg	0.08	0.01	0.65	36	f	Paraguay	n	NA	normal	NA	NA	NA	NA	control
12789	0.53	0.00	0.00	0.00	NA	NA	neg	0.10	0.01	0.87	47	f	Bolivia	n	NA	normal	NA	NA	NA	NA	control
12805	26.27	12.30	0.00	0.00	NA	NA	neg	0.08	0.00	0.67	32	f	Bolivia	n	NA	NA	NA	NA	NA	NA	control
12810	5.25	3.08	0.00	0.00	NA	NA	neg	0.09	0.01	0.78	57	m	Peru	n	NA	normal	NA	NA	NA	NA	control
12865	0.00	0.00	2.17	0.00	NA	NA	neg	0.26	0.02	2.25	57	f	Bolivia	y	auto	normal	NA	NA	NA	NA	control
10712	66.87	36.08	11.93	0.00	15.57	2.61	pos	0.71	0.09	3.91	44	f	Bolivia	n	NA	normal	NA	NA	0	NA	ind
10917	10.68	0.00	0.00	0.00	NA	11.22	pos	0.23	0.01	1.25	50	f	Bolivia	n	NA	normal	normal	normal	0	NA	ind
11166	60.09	41.39	0.00	0.00	28.29	10.67	pos	1.08	0.03	5.99	38	f	Paraguay	n	NA	normal	normal	normal	0	NA	ind
11725	51.67	13.87	1.86	0.00	20.4	12.06	pos	1.07	0.07	5.94	40	m	Bolivia	n	NA	normal	normal	normal	0	NA	ind
11832	41.63	15.32	6.74	0.35	26.69	9.83	pos	0.94	0.01	5.19	41	f	Bolivia	n	NA	normal	normal	normal	0	NA	ind
11894	58.53	36.76	19.41	6.15	NA	11.12	pos	1.06	0.05	5.89	39	f	Bolivia	n	NA	normal	normal	normal	0	NA	ind
12476	53.46	7.65	0.90	0.00	22.19	7.6	pos	0.91	0.03	5.05	57	f	Brasil	y	other	normal	abnormal	normal	1	NA	sympt
12481	21.11	5.58	0.00	0.46	20.8	8	pos	0.49	0.04	2.73	60	f	Bolivia	n	NA	NA	NA	NA	0	NA	ind
12483	45.48	19.82	0.00	0.00	35.84	11.78	pos	1.06	0.12	5.86	5	m	Bolivia	n	NA	abnormal	NA	NA	1	Classified as inditerminate despite kuschnir 1	ind
12494	35.27	22.90	16.08	8.96	25.49	9.88	pos	0.93	0.03	5.16	55	f	Bolivia	y	other	normal	normal	normal	0	NA	ind
12497	52.45	36.08	26.79	25.08	8.85	NA	pos	0.83	0.28	4.60	3	m	Bolivia	n	NA	normal	normal	normal	0	NA	ind
12498	26.54	8.75	0.00	0.00	30.87	12.79	pos	1.03	0.04	5.72	47	f	Bolivia	n	NA	normal	normal	normal	0	NA	ind
12499	35.15	4.10	0.00	0.00	12	1.05	pos	0.13	0.03	0.70	38	f	Bolivia	n	NA	normal	NA	NA	0	NA	ind
12504	29.85	15.10	0.79	0.00	14.78	10.89	pos	1.02	0.04	5.64	41	f	Bolivia	n	NA	normal	NA	NA	0	NA	ind
12509	12.01	6.26	4.77	0.46	5.75	2.13	pos	0.48	0.02	2.67	35	f	Bolivia	n	NA	normal	NA	normal	0	NA	ind
12513	34.77	50.16	8.88	0.00	36.49	11.37	pos	1.09	0.02	6.02	43	f	Bolivia	y	other	normal	abnormal	normal	0	NA	ind
12514	28.63	20.19	7.19	0.00	42.14	12.3	pos	1.05	0.04	5.83	58	f	Bolivia	y	other	normal	abnormal	normal	0	NA	ind
12515	24.50	10.77	0.73	0.00	10.2	1.91	pos	0.46	0.02	2.53	42	f	Bolivia	n	NA	normal	normal	normal	0	NA	ind
12517	25.00	4.74	0.00	0.00	32.22	11.7	pos	1.01	0.12	5.60	50	m	Bolivia	n	NA	abnormal	abnormal	NA	1	NA	sympt
12520	50.05	25.38	1.40	0.00	42.68	11.04	pos	0.95	0.01	5.27	1	f	Bolivia	n	NA	normal	normal	normal	0	NA	ind
12521	40.86	39.85	8.84	0.00	39.74	12.14	pos	0.95	0.08	5.25	55	m	Bolivia	n	NA	NA	normal	normal	0	NA	ind
12528	54.94	36.34	23.05	27.99	10.56	NA	pos	1.04	0.07	5.76	38	f	Bolivia	n	NA	normal	NA	NA	0	NA	ind
12539	46.42	44.02	33.85	45.85	25.22	10.45	pos	1.05	0.09	5.83	39	f	Bolivia	n	NA	normal	normal	normal	0	NA	ind
12565	61.97	29.12	9.59	8.50	21.97	10.32	pos	1.07	0.05	5.92	38	f	Bolivia	n	NA	NA	NA	NA	0	NA	ind
12572	55.43	12.04	2.50	0.00	NA	10.26	pos	1.08	0.04	5.96	56	m	Bolivia	y	other	normal	normal	normal	0	NA	ind
12579	50.38	35.72	16.38	0.00	28.49	10.9	pos	1.00	0.05	5.51	58	m	Bolivia	n	NA	normal	NA	normal	0	NA	sympt
12581	52.02	18.39	3.67	0.00	11.84	2.61	pos	1.05	0.03	5.83	44	m	Bolivia	n	NA	normal	normal	normal	0	NA	ind
12603	34.65	13.17	0.00	0.00	18.9	8.72	pos	0.96	0.02	5.30	42	m	Bolivia	n	NA	normal	NA	NA	0	NA	ind
12606	26.36	13.30	0.00	0.00	20.31	8.95	pos	0.90	0.05	4.98	66	f	Bolivia	y	auto	normal	abnormal	normal	1	NA	sympt
12614	55.81	41.97	22.39	26.35	26.7	9.38	pos	1.03	0.07	5.72	36	f	Bolivia	n	NA	normal	NA	NA	0	NA	ind
12636	37.82	18.15	0.00	0.00	34.759	12.01	pos	1.08	0.16	5.97	40	m	Bolivia	n	NA	normal	normal	normal	0	NA	ind
12638	44.68	11.81	3.37	0.00	27.18	9.63	pos	0.95	0.08	5.25	60	f	Bolivia	n	NA	normal	normal	normal	0	NA	ind
12647	29.52	0.00	0.00	4.78	23.636	11.32	pos	0.26	0.01	1.46	41	f	Bolivia	n	NA	normal	abnormal	normal	0	NA	ind
12664	20.73	0.00	0.00	0.00	NA	2.78	pos	0.74	0.02	4.10	47	f	Bolivia	n	NA	normal	abnormal	normal	0	NA	ind
12716	60.57	50.77	22.61	49.40	27.15	13.81	pos	1.05	0.05	5.82	51	m	Bolivia	n	NA	normal	normal	normal	0	NA	ind
12743	23.21	9.74	0.00	0.00	22.92	5.95	pos	0.99	0.10	5.48	46	f	Bolivia	n	NA	normal	abnormal	normal	0	NA	ind
12768	54.36	78.14	17.17	1.04	23.4	11.61	pos	1.13	0.02	9.76	31	f	Bolivia	n	NA	normal	abnormal	normal	0	NA	ind
12813	34.36	0.33	0.00	0,.69	9.1	2.99	pos	0.90	0.08	4.96	56	f	Bolivia	n	NA	normal	NA	NA	NA	NA	ind
12820	69.88	50.35	35.80	9.11	26.227	14.21	pos	1.35	0.09	11.72	47	m	Bolivia	n	NA	normal	normal	NA	0	NA	ind
12837	45.94	32.96	10.41	8.29	16.67	10.96	pos	0.72	0.02	6.25	26	f	Bolivia	n	NA	normal	normal	NA	0	NA	ind
12841	44.01	35.56	23.13	17.97	20.3	9.83	pos	0.92	0.09	7.95	27	m	Bolivia	y	other	normal	normal	normal	0	NA	ind
12842	31.79	1.44	0.47	2.80	20.19	6.8	pos	1.12	0.03	9.68	60	f	Bolivia	y	other	normal	abnormal	normal	1	NA	sympt
12850	37.76	1.58	0.00	0.00	18.31	10.24	pos	1.05	0.03	5.83	81	m	Bolivia	y	other	abnormal	normal	abnormal	2	NA	sympt
12853	44.05	1.50	0.00	0.00	11.6	11.32	pos	1.06	0.06	5.86	33	f	Bolivia	n	NA	NA	NA	NA	NA	NA	ind
12901	54.50	40.04	19.29	41.16	19.66	11.8	pos	0.96	0.06	8.29	46	f	Bolivia	n	NA	normal	abnormal	normal	0	NA	ind
Legend
EKG	Electrocardiogram
RX	Chest X-ray
US	Chest Ultrasound
ind	Indeterminate (asymptomatic)
sympt	Symptomatic patient
